# Supplementary material for: Clinical and molecular characterization of a Brazilian cohort of campomelic dysplasia patients, and identification of seven new SOX9 mutations
Source: PubMed Central journal article supplement — Genet Mol Biol. 2014 Mar 17;38(1):14–20. doi: 10.1590/S1415-475738120140147 (PMC4415563; doi:10.1590/s1415-475738120140147), 2014-03-17
Supplement: 1415-4757-gmb-38-1-14-suppl01.pdf [file 1415-4757-gmb-38-1-14-suppl01.pdf]

Table S1: Detailed clinical evaluation of CD patients included in the study.

| Clinical findings        | Patients |   |   |   |   |   |   |   |   |
|--------------------------|----------|---|---|---|---|---|---|---|---|
|                          | 1        | 2 | 3 | 5 | 5 | 6 | 7 | 8 | 9 |
| Prominent frontal bone   | +        |   |   | + |   |   |   |   |   |
| Prominent occipital bone |          |   | + | + | + | + |   | + |   |
| Flat face                |          |   |   | + | + |   | + | + | + |
| Low-set ears             | +        |   |   | + | + |   |   |   |   |
| Epicanthal folds         |          |   | + | + |   |   |   |   |   |
| Midface hypoplasia       | +        |   |   |   |   |   | + |   |   |
| Arched/high palate       |          |   | + | + |   |   |   |   |   |
| Cleft palate             |          | + |   |   | + | + |   | + |   |
| Bulbous nose             |          |   | + | + |   |   |   |   |   |
| Flat nasal bridge        | +        | + | + |   |   |   |   |   |   |
| Inverted nares           | +        |   |   |   |   | + | + |   |   |
| Long philtrum            |          |   | + | + | + |   |   |   |   |
| Micro/retrognathia       | +        | + | + | + | + | + | + | + |   |
| Pierre-Robin sequence    |          |   |   |   | + |   |   |   |   |
| Short/wide neck          | +        |   |   | + | + | + | + |   |   |
| Excessive neck skin      |          |   | + |   |   |   |   |   | + |
| Short trunk              | +        |   |   |   |   | + |   |   | + |
| Wide thorax              |          |   |   | + |   |   | + |   |   |
| Mammillary hypertelorism |          |   |   | + |   | + | + |   |   |
| Inverted nipples         |          |   |   | + |   |   | + |   |   |

|                          | <b>Patients [continued]</b> |   |   |   |   |   |   |   |   |
|--------------------------|-----------------------------|---|---|---|---|---|---|---|---|
| <b>Clinical findings</b> | 1                           | 2 | 3 | 4 | 5 | 6 | 7 | 8 | 9 |
| Short limbs              | +                           | + | + | + | + | + | + | + | + |
| Bowing of lower limbs    | +                           | + | + | + | + | + | + | + | + |
| Pretibial skin dimples   | +                           |   | + | + | + | + | + | + | + |
| Nail hypoplasia          | +                           |   |   |   |   |   |   | + |   |
| Club feet                | +                           | + | + | + | + |   | + | + |   |
