# Supplementary material for: Clinical and molecular characterization of a Brazilian cohort of campomelic dysplasia patients, and identification of seven new SOX9 mutations
Source: PubMed Central journal article supplement — Genet Mol Biol. 2014 Mar 17;38(1):14–20. doi: 10.1590/S1415-475738120140147 (PMC4415563; doi:10.1590/s1415-475738120140147), 2014-03-17
Supplement: 1415-4757-gmb-38-1-14-suppl03.pdf [file 1415-4757-gmb-38-1-14-suppl03.pdf]

Table S3: Compilation of all reported SOX9 mutations associated to CD and ACD.

| SOX9 – premature termination codon |               |              |        |                              |           |                 |                     |                            |
|------------------------------------|---------------|--------------|--------|------------------------------|-----------|-----------------|---------------------|----------------------------|
| Exon                               | cDNA          | Protein      | Domain | Karyotype                    | Phenotype | Sex             | Survival            | Reference                  |
| 1                                  | c.82G>T       | p.E28Ter     |        | NS                           | CD        | NS              | NS                  | [Massardier et al., 2008]  |
| 1                                  | c.122C>A      | p.K151Ter    |        | SRY <sup>+</sup>             | CD        | M               | NS [neonatal]       | <b>This study</b>          |
| 1                                  | c.257G>A      | p.W86Ter     |        | 46,XX                        | CD        | F               | 12 days             | [Meyer et al., 1997]       |
| 1                                  | c.261_262insG | p.T87fs251*  |        | 46,XY,del[6]<br>[q23.2-23.3] | CD        | {M}/<br>{M}     | Alive at 5 yrs      | [Okamoto et al., 2010]     |
| 1                                  | c.296delG     | p.S99fs109*  |        | 46,XY                        | CD        | F*              | Alive at 5 yrs      | [Ninomiya et al., 2000]    |
| 1                                  | c.349C>T      | p.Q117Ter    | HMG    | 46,XY                        | CD        | F*              | Alive at 12 yrs     | [Meyer et al., 1997]       |
| 1                                  | c.390del7     | p.H131fs248* | HMG    | 46,XX                        | CD        | F               | NS [neonatal]       | <b>This study</b>          |
| 2                                  | c.442G>T      | p.E148Ter    | HMG    | 46,XY                        | CD        | F*              | NS [neonatal]       | [Wagner et al., 1994]      |
| 2                                  | c.442G>T      | p.E148Ter    | HMG    | 46,XX                        | CD        | F               | 1 yr 5 mo           | [Wada et al., 2009]        |
| 2                                  | c.448G>T      | p.E150Ter    | HMG    | 46,XX                        | CD        | F               | 2 mo                | [Shotelersuk et al., 2006] |
| 2                                  | c.451A>T      | p.K151Ter    | HMG    | 46,XY                        | CD        | {M}             | 24 days             | <b>This study</b>          |
| 2                                  | c.583C>T      | p.Q195Ter    |        | 46,XX                        | CD        | F               | NS                  | [Foster et al., 1994]      |
| 2                                  | c.600delC     | p.P200fs218* |        | 46,XY                        | CD        | F* <sup>a</sup> | Alive at 8 yrs      | [Cost et al., 2009]        |
| 2                                  | c.611delT     | p.F204fs218* |        | SRY <sup>-</sup>             | CD        | F               | 2.5 mo              | <b>This study</b>          |
| 2                                  | c.694C>T      | p.Gln232Ter  |        | 46,XX                        | CD        | F               | 11 days             | <b>This study</b>          |
| 3                                  | c.714_715insA | p.T239fs250* |        | 46,XX                        | CD        | F               | 1 mo                | [Gentilin et al., 2010]    |
| 3                                  | c.737_738insC | p.Q246fs251* |        | 46,XX                        | CD        | F               | Neonatal            | [Cameron et al., 1996]     |
| 3                                  | c.737_738insC | p.Q246fs251* |        | 46,XY                        | CD        | F*              | Neonatal            | [Cameron et al., 1996]     |
| 3                                  | c.737_738insC | p.Q246fs251* |        | 46,XY                        | CD        | F* <sup>b</sup> | Neonatal            | [Cameron et al., 1996]     |
| 3                                  | c.771_772ins5 | p.G257fs296* |        | 46,XY                        | CD        | F*              | Stillbirth [25 wks] | [Wada et al., 2009]        |
| 3                                  | c.783_784insG | p.G263fs294* |        | 46,XY                        | CD        | F*              | NS                  | [Foster et al., 1994]      |
| 3                                  | c.783-788delG | p.G263fs277* |        | SRY <sup>-</sup>             | CD        | F               | 1 day               | <b>This study</b>          |

**SOX9 – premature termination codon [continued]**

| Exon | cDNA                                | Protein                | Domain | Karyotype | Phenotype | Sex | Survival             | Reference               |
|------|-------------------------------------|------------------------|--------|-----------|-----------|-----|----------------------|-------------------------|
| 3    | c.788_808del21 ou<br>c.789_809del21 | p.G263fs502*           |        | 46,XX     | CD        | F   | Termination [16 wks] | [Gentilin et al., 2010] |
| 3    | c.820_829del10                      | p.E277fs278*           |        | 46,XX     | CD        | F   | 2.5 mo               | [Meyer et al., 1997]    |
| 3    | c.858_859ins4                       | p.286fs294*            |        | 46,XY     | CD        | F*  | NS                   | [Foster et al., 1994]   |
| 3    | c.1070_1112del43                    | p.Q357fs368*           | PQA    | 46,XY     | CD        | F*  | 2 days               | [Meyer et al., 1997]    |
| 3    | c.1123C>T                           | p.Q375Ter              | PQA    | 46,XY     | CD        | F*  | 7 wks                | [Meyer et al., 1997]    |
| 3    | c.1198G>T                           | p.E400Ter              |        | 46,XY     | CD        | M   | 2.5 mo               | [Meyer et al., 1997]    |
| 3    | c.1201C>T                           | p.Q401Ter              |        | 46,XY     | CD        | F*  | NS                   | [Stoeva et al., 2011]   |
| 3    | c.1320C>G                           | p.Y440Ter              | TA     | 46,XY     | CD        | F*  | NS [neonatal]        | [Wagner et al., 1994]   |
| 3    | c.1320C>G                           | p.Y440Ter              | TA     | 46,XX     | CD        | F   | Alive at 11 yrs      | [Meyer et al., 1997]    |
| 3    | c.1320C>A                           | p.Y440Ter <sup>d</sup> | TA     | 46,XY     | CD        | F*  | 3 mo                 | [Pop et al., 2005]      |
| 3    | c.1330_1333del4                     | p.443fs468*            | TA     | 46,XX     | CD        | F   | Alive at 11 yrs      | [Wada et al., 2009]     |
| 3    | c.1372delC                          | p.Q458Rfs468*          | TA     | 46,XY     | CD        | M   | 4 mo                 | [Kim et al., 2011]      |

**SOX9 – C-terminal extensions**

| Exon | cDNA                               | Protein                           | Domain | Karyotype | Phenotype | Sex             | Survival            | Reference               |
|------|------------------------------------|-----------------------------------|--------|-----------|-----------|-----------------|---------------------|-------------------------|
| 3    | c.888_889insC                      | p.P297fs577*                      |        | 46,XX     | CD        | F               | Alive at 6 yrs      | [Okamoto et al., 2010]  |
| 3    | c.984_985insG +<br>c.1061_1069del9 | p.P328fs576* +<br>p.P354_P356del3 |        | 46,XY     | CD        | F*              | NS [neonatal]       | [Wagner et al., 1994]   |
| 3    | c.1095G>AT                         | p.A365fs586*                      | PQA    | 46,XY     | CD        | F*              | 4 mo                | [Hsiao et al., 2006]    |
| 3    | c.1103_1104insA                    | p.Q368fs576*                      | PQA    | 46,XY     | CD        | [M]             | >1 day              | [Kwok et al., 1995]     |
| 3    | c.1103_1104insA                    | p.Q368fs576*                      | PQA    | 46,XY     | CD        | F*              | >1 day              | [Kwok et al., 1995]     |
| 3    | c.1216_1217ins16                   | p.H406fs574*                      | TA     | 46,XX     | CD        | F               | Terminated [21 wks] | [Gentilin et al., 2010] |
| 3    | c.1456_1457insG                    | p.S484fs576*                      | TA     | 46,XX     | CD        | F               | 5 yrs               | [Giordano et al., 2001] |
| 3    | c.1113_1114insG                    | p.E499fs576*                      | TA     | 46,XY     | CD        | M               | Terminated [23 wks] | [Gentilin et al., 2010] |
| 3    | c.1514_1515insC                    | p.T381fs576*                      | TA     | 46,XY     | ACD       | F* <sup>b</sup> | Terminated [22 wks] | [Beaulieu et al. 2009]  |

**SOX9 – C-terminal extensions [continued]**

| Exon | cDNA            | Protein      | Domain | Karyotype | Phenotype | Sex | Survival | Reference           |
|------|-----------------|--------------|--------|-----------|-----------|-----|----------|---------------------|
| 3    | c.1519_1520ins4 | p.T507fs558* | TA     | 46,XX     | CD        | F   | >1 day   | [Kwok et al., 1995] |

**SOX9 – missense mutations**

| Exon | cDNA     | Protein | Domain | Karyotype | Phenotype            | Sex             | Survival               | Reference                 |
|------|----------|---------|--------|-----------|----------------------|-----------------|------------------------|---------------------------|
| 1    | c.227C>A | p.A76E  | Dimer  | 46,XY     | CD                   | M               | Alive at 6 yrs         | [Sock et al., 2003]       |
| 1    | c.316A>G | p.K106E | HMG    | 46,XX     | CD                   | F               | Terminated [21 wks]    | [Gentilin et al., 2010]   |
| 1    | c.323C>T | p.P108L | HMG    | 46,XY     | CD                   | F*              | 6 mo                   | [Meyer et al., 1997]      |
| 1    | c.334T>C | p.F112L | HMG    | 46,XY     | CD                   | F* <sup>c</sup> | Few days               | [Kwok et al., 1995]       |
| 1    | c.335T>C | p.F112S | HMG    | 46,XY     | CD                   | [M]/<br>{M}     | Alive at 8 yrs         | [Meyer et al., 1997]      |
| 1    | c.337A>G | p.M113V | HMG    | 46,XX     | ACD                  | F               | Alive at 2 yrs         | [Staffler et al., 2010]   |
| 1    | c.338T>C | p.M113T | HMG    | 46,XX     | CD                   | F               | 5 mo                   | [Wada et al., 2009]       |
| 1    | c.356C>T | p.A119V | HMG    | 46,XX     | CD                   | F               | 12 days                | [Kwok et al., 1995]       |
| 1    | c.427T>C | p.W143R | HMG    | 46,XY     | CD                   | F*              | 5 mo                   | [Meyer et al., 1997]      |
| 2    | c.455G>C | p.R152P | HMG    | 46,XX     | CD                   | F               | 2 days                 | [Meyer et al., 1997]      |
| 2    | c.455G>C | p.R152P | HMG    | 46,XX     | ACD                  | F               | NS                     | [Friedrich et al., 2000]  |
| 2    | c.462C>G | p.F154L | HMG    | 46,XX     | CD                   | F               | 1 day                  | [Preiss et al., 2001]     |
| 2    | c.472G>A | p.A158T | HMG    | 46,XY     | CD                   | F*              | Alive at 19 yrs        | [Preiss et al., 2001]     |
| 2    | c.493C>T | p.H165Y | HMG    | 46,XY     | CD                   | M               | Alive at 10 yrs        | [McDowall et al., 1999]   |
| 2    | c.493C>T | p.H165Y | HMG    | 46,XY     | ACD                  | M               | Alive at 1.8 yrs       | [Moog et al., 2001]       |
| 2    | c.494A>C | p.H165P | HMG    | 46,XY     | CD                   | {M}             | Terminated [20 wks]    | [Tonni et al., 2013]      |
| 2    | c.495C>G | p.H165Q | HMG    | 46,XY     | ACD                  | M               | Alive at 8 yrs         | [Staffler et al., 2010]   |
| 2    | c.506A>C | p.H169P | HMG    | NS        | CD                   |                 | Terminated [2nd trim.] | [Massardier et al., 2008] |
| 2    | c.507C>G | p.H169Q | HMG    | NS        | CD/ SPS <sup>e</sup> | M               | Alive at 10 yrs        | [Matsushita et al., 2013] |
| 2    | c.509C>G | p.P170R | HMG    | 46,XY     | CD                   | M               | 1 mo                   | [Meyer et al., 1997]      |

| <b>SOX9 – missense mutations [continued]</b> |             |                |               |                  |                  |            |                     |                                |
|----------------------------------------------|-------------|----------------|---------------|------------------|------------------|------------|---------------------|--------------------------------|
| <b>Exon</b>                                  | <b>cDNA</b> | <b>Protein</b> | <b>Domain</b> | <b>Karyotype</b> | <b>Phenotype</b> | <b>Sex</b> | <b>Survival</b>     | <b>Reference</b>               |
| 2                                            | c.509C>T    | p.P170L        | HMG           | 46,XY            | ACD              | M          | Alive at 11 yrs     | [Sock et al., 2003]            |
| 2                                            | c.509C>T    | p.P170L        | HMG           | 46,X             | ACD              | F          | Alive at 10.5 yrs   | [Gentilin et al., 2010]        |
| 2                                            | c.517A>G    | p.K173E        | HMG           | 46,XY            | ACD              | [M]        | Alive at 11 mo      | [Thong et al., 2000]           |
| 2                                            | c.527C>T    | p.P176L        | HMG           | 46,XY            | ACD              | F*         | Terminated [33 wks] | [Michel-Calemard et al., 2004] |
| 2                                            | c.527C>T    | p.P176L        | HMG           | NS               | ACD              | M          | NS                  | [Gopakumar et al., 2013]       |

| <b>SOX9 – splice-site mutations</b> |             |                |               |                  |                  |            |                 |                       |
|-------------------------------------|-------------|----------------|---------------|------------------|------------------|------------|-----------------|-----------------------|
| <b>Exon</b>                         | <b>cDNA</b> | <b>Protein</b> | <b>Domain</b> | <b>Karyotype</b> | <b>Phenotype</b> | <b>Sex</b> | <b>Survival</b> | <b>Reference</b>      |
|                                     | IVS1-2A>C   | -              | -             | 46,XY            | CD               | F*         | NS              | [Kwok et al., 1995]   |
|                                     | IVS1-2A>G   | -              | -             | 46,XX            | CD               | F          | NS [neonatal]   | <b>This study</b>     |
|                                     | IVS2+1G>A   | -              | -             | 46,XY            | CD               | F*         | NS [neonatal]   | [Wagner et al., 1994] |

| <b>SOX9 – in-phase deletions</b> |                  |                               |               |                  |                  |            |                  |                     |
|----------------------------------|------------------|-------------------------------|---------------|------------------|------------------|------------|------------------|---------------------|
| <b>Exon</b>                      | <b>cDNA</b>      | <b>Protein</b>                | <b>Domain</b> | <b>Karyotype</b> | <b>Phenotype</b> | <b>Sex</b> | <b>Survival</b>  | <b>Reference</b>    |
| 1                                | c.196_225del30   | p.E66_E75del10                | Dimer         | 46,XX            | CD               | F          | >1 day           | [Sock et al., 2003] |
| 3                                | c.1047_1130del84 | p.P301_P328del28 <sup>d</sup> | PQA           | 46,XY            | ACD              | F*         | Alive at 1.8 yrs | [Chen et al., 2012] |

<sup>a</sup>With dysgerminoma. <sup>b</sup>With true hermaphroditism. <sup>c</sup>Patient characterized as 'intersex'. <sup>d</sup>Mutation in homozygosis. <sup>e</sup>Mild CD/ small patella syndrome. M: male; [M]: male with hypospadias; {M}: male with small penis; M\*: 46,XX sex reversal; F: female; F\*: 46,XY, sex reversal, as proposed by Fonseca et al. [32]. ACD: acampomelic campomelic dysplasia; CD: campomelic dysplasia; Dimer: dimerization domain; HMG: high-mobility group DNA binding domain; NS: not specified; PQA: proline-glutamine-alanine-rich domain; TA: transactivation domain.

## Supporting references

Beaulieu BM, Lemyre E, Rypens F, Scherer G, Lemieux N, Fournet J-C (2009) Diagnosis of true hermaphroditism in a fetus with acampomelic campomelic dysplasia. *Prenat Diagn* 29:528–530.

Cameron FJ, Hageman RM, Cooke-Yarborough C, Kwok C, Goodwin LL, Sillence DO, Sinclair AH (1996) A novel germ line mutation in SOX9 causes familial campomelic dysplasia and sex reversal. *Hum Mol Genet* 5:1625–1630.

Chen S-Y, Lin S-J, Tsai L-P, Chou Y-Y (2012) Sex-reversed acampomelic campomelic dysplasia with a homozygous deletion mutation in SOX9 gene. *Urology* 79:908–911.

Corbani S, Chouery E, Eid B, Jalkh N, Ghoch JA, Mégarbané A (2011) Mild Campomelic Dysplasia: Report on a Case and Review. *Mol. Syndromol.* 1:163–168.

Cost NG, Ludwig AT, Wilcox DT, Rakheja D, Steinberg SJ, Baker LA (2009) A novel SOX9 mutation, 972delC, causes 46,XY sex-reversed campomelic dysplasia with nephrocalcinosis, urolithiasis, and dysgerminoma. *J Pediatr Surg* 44:451–454.

Fonseca ACS, Bonaldi A, Bertola DR, Kim CA, Otto PA, Vianna-Morgante AM (2013) The clinical impact of chromosomal rearrangements with breakpoints upstream of the SOX9 gene: two novel de novo balanced translocations associated with acampomelic campomelic dysplasia. *BMC Med Genet* 14:50.

Foster JW, Dominguez-Steglich MA, Guioli S, Kwok C, Weller PA, Stevanović M, Weissenbach J, Mansour S, Young ID, Goodfellow PN (1994) Campomelic dysplasia and autosomal sex reversal caused by mutations in an SRY-related gene. *Nature* 372:525–530.

Friedrich U, Schaefer E, Meinecke P, Scherer G (2000) SOX9 mutation in a previously published case of campomelic dysplasia without overt campomelia. *Clin Dysmorphol* 9:233.

Gentilin B, Forzano F, Bedeschi MF, Rizzuti T, Faravelli F, Izzi C, Lituania M, Rodriguez-Perez C, Bondioni MP, Savoldi G *et al.* (2010) Phenotype of five cases of prenatally diagnosed campomelic dysplasia harboring novel mutations of the SOX9 gene. *Ultrasound Obstet Gynecol* 36:315–323.

Giordano J, Prior HM, Bamforth JS, Walter MA (2001) Genetic study of SOX9 in a case of campomelic dysplasia. *Am J Med Genet* 98:176–181.

Gopakumar H, Superti-Furga A, Unger S, Scherer G, Rajiv PK, Nampoothiri S (2013) Acampomelic Form of Campomelic Dysplasia with SOX9 Missense Mutation. *Indian J Pediatr.*

Hsiao H-P, Tsai L-P, Chao M-C, Tseng H-I, Chang YC (2006) Novel SOX9 gene mutation in campomelic dysplasia with autosomal sex reversal. *J Formos Med Assoc* 105:1013–1016.

Kim H-Y, Yoon CH, Kim G-H, Yoo H-W, Lee BS, Kim KS, Kim EA-R (2011) A case of campomelic dysplasia without sex reversal. *J Korean Med Sci* 26:143–145.

Kwok C, Weller PA, Guioli S, Foster JW, Mansour S, Zuffardi O, Punnett HH, Dominguez-Steglich MA, Brook JD, Young ID (1995) Mutations in SOX9, the gene responsible for Campomelic dysplasia and autosomal sex reversal. *Am J Hum Genet* 57:1028–1036.

Massardier J, Roth P, Michel-Calemard L, Rudigoz RC, Bouvier R, Dijoud F, Arnould P, Combourieu D, Gaucherand P (2008) Campomelic dysplasia: echographic suspicion in the first trimester of pregnancy and final diagnosis of two cases. *Fetal Diagn Ther* 24:452–457.

Matsushita M, Kitoh H, Kaneko H, Mishima K, Kadono I, Ishiguro N, Nishimura G (2013) A novel SOX9 H169Q mutation in a family with overlapping phenotype of mild campomelic dysplasia and small patella syndrome. *Am J Med Genet A* 161:2528–2534.

McDowall S, Argentaro A, Ranganathan S, Weller P, Mertin S, Mansour S, Tolmie J, Harley V (1999) Functional and structural studies of wild type SOX9 and mutations causing campomelic dysplasia. *J Biol Chem* 274: 24023–24030.

Meyer J, Südbek P, Held M, Wagner T, Schmitz ML, Bricarelli FD, Eggermont E, Friedrich U, Haas OA, Kobelt A *et al.* (1997) Mutational analysis of the SOX9 gene in campomelic dysplasia and autosomal sex reversal: lack of genotype/phenotype correlations. *Hum Mol Genet* 6: 91–98.

Michel-Calemard L, Lesca G, Morel Y, Boggio D, Plauchu H, Attia-Sobol J (2004) Campomelic acampomelic dysplasia presenting with increased nuchal translucency in the first trimester. *Prenat Diagn* 24:519–523.

Moog U, Jansen NJ, Scherer G, Schrandt-Stumpel CT (2001) Acampomelic campomelic syndrome. *Am J Med Genet* 104:239–245.

Ninomiya S, Yokoyama Y, Teraoka M, Mori R, Inoue C, Yamashita S, Tamai H, Funato M, Seino Y (2000) A novel mutation (296 del G) of the SOX9 gene in a patient with campomelic syndrome and sex reversal. *Clin Genet* 58:224–227.

Okamoto T, Nakamura E, Nagaya K, Hayashi T, Mukai T, Fujieda K (2010) Patient reports: Two novel frameshift mutations in the SOX9 gene in two patients with campomelic dysplasia who showed long-term survival. *J Pediatr Endocrinol Metab* 23:1189–1193.

Pop R, Zaragoza MV, Gaudette M, Dohrmann U, Scherer G (2005) A homozygous nonsense mutation in SOX9 in the dominant disorder campomelic dysplasia: a case of mitotic gene conversion. *Hum Genet* 117:43–53.

Preiss S, Argentaro A, Clayton A, John A, Jans DA, Ogata T, Nagai T, Barroso I, Schafer AJ, Harley VR (2001) Compound effects of point mutations causing campomelic dysplasia/autosomal sex reversal upon SOX9 structure, nuclear transport, DNA binding, and transcriptional activation. *J Biol Chem* 276:27864–27872.

Shotelersuk V, Jaruratanasirikul S, Sinthuwiat T, Janjindamai W (2006) A novel nonsense mutation, E150X, in the SOX9 gene underlying campomelic dysplasia. *Genet Mol Biol* 29:617–620.

Sock E, Pagon RA, Keymolen K, Lissens W, Wegner M, Scherer G (2003) Loss of DNA-dependent dimerization of the transcription factor SOX9 as a cause for campomelic dysplasia. *Hum Mol Genet* 12:1439–1447.

Staffler A, Hammel M, Wahlbuhl M, Bidlingmaier C, Flemmer AW, Pagel P, Nicolai T, Wegner M, Holzinger A (2010) Heterozygous SOX9 mutations allowing for residual DNA-binding and transcriptional activation lead to the acampomelic variant of campomelic dysplasia. *Hum Mutat* 31:E1436–44.

Stoeva R, Grozdanova L, Scherer G, Krasteva M, Bausch E, Krastev T, Linev A, Stefanova M (2011) A novel SOX9 nonsense mutation, q401x, in a case of campomelic dysplasia with XY sex reversal. *Genet Couns* 22:49–53.

Thong MK, Scherer G, Kozlowski K, Haan E, Morris L (2000) Acampomelic campomelic dysplasia with SOX9 mutation. *Am J Med Genet* 93:421–425.

Tonni G, Ventura A, Pattacini P, Bonasoni MP, Baffico AM (2013) p.His165Pro: a novel SOX9 missense mutation of campomelic dysplasia. *J Obstet Gynaecol Res* 39:1085–1091.

Wada Y, Nishimura G, Nagai T, Sawai H, Yoshikata M, Miyagawa S, Hanita T, Sato S, Hasegawa T, Ishikawa S *et al.* (2009) Mutation analysis of SOX9 and single copy number variant analysis of the upstream region in eight patients with campomelic dysplasia and acampomelic campomelic dysplasia. *Am J Med Genet A* 149A:2882–2885.

Wagner T, Wirth J, Meyer J, Zabel B, Held M, Zimmer J, Pasantes J, Bricarelli FD, Keutel J, Hustert E *et al.* (1994) Autosomal sex reversal and campomelic dysplasia are caused by mutations in and around the SRY-related gene SOX9. *Cell* 79:1111–1120.

Yusuf D, Butland, SL, Swanson MI, Bolotin E, Ticoll A, Cheung WA, Zhang XYC, Dickman CTD, Futon DL, Lim JS *et al.* (2012) The transcription factor encyclopedia. *Genome Biol* 13(3):R24.
