# Supplementary material for: Clinical and molecular characterization of a Brazilian cohort of campomelic dysplasia patients, and identification of seven new SOX9 mutations
Source: PubMed Central journal article supplement — Genet Mol Biol. 2014 Mar 17;38(1):14–20. doi: 10.1590/S1415-475738120140147 (PMC4415563; doi:10.1590/s1415-475738120140147), 2014-03-17
Supplement: 1415-4757-gmb-38-1-14-suppl04.pdf [file 1415-4757-gmb-38-1-14-suppl04.pdf]

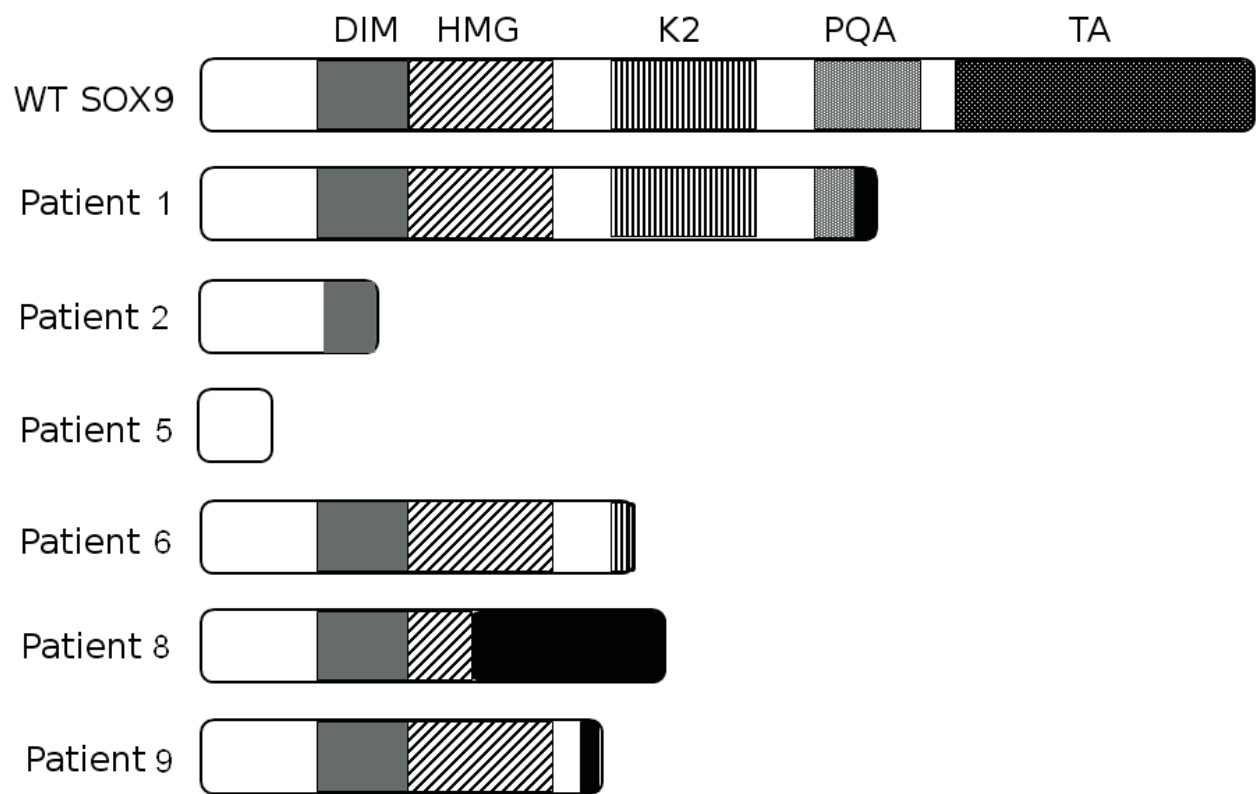

**Figure S1** - Putative SOX9 proteins resultant from the premature stop codon mutations identified in six CD patients.
